# Supplementary material
Source: publisher figshare collection journal article supplement (https://plos.figshare.com/articles/dataset/_/3094207)
Supplement: Supplementary file [file 1]

**S1 Table.** Baseline characteristics of mothers at 8 week of gestation and children at birth participating in the MINIMat trial, Bangladesh. Stratified for non-analyzed and analyzed children.

| CHARACTERISTICS      |                         | Children not analyzed <sup>1</sup><br>N=536 |         | Children included in the analysis<br>N=1054 |          |
|----------------------|-------------------------|---------------------------------------------|---------|---------------------------------------------|----------|
|                      |                         | %                                           | n       | %                                           | n        |
| Mothers              |                         |                                             |         |                                             |          |
| Age                  |                         |                                             |         |                                             |          |
|                      | <20                     | 19.8                                        | 106/536 | 14.0                                        | 148/1054 |
|                      | 20-29                   | 53.9                                        | 289/536 | 56.5                                        | 595/1054 |
|                      | ≥30                     | 26.3                                        | 141/536 | 29.5                                        | 311/1054 |
| BMI at 8 week        |                         |                                             |         |                                             |          |
|                      | <18,5                   | 27.6                                        | 147/533 | 31.0                                        | 325/1049 |
|                      | ≥18,5                   | 72.4                                        | 386/533 | 69.0                                        | 724/1049 |
| Height               |                         |                                             |         |                                             |          |
|                      | Shortest (<147.5 cm)    | 31.8                                        | 170/535 | 14.9                                        | 157/1052 |
|                      | Average (≥147,5<152 cm) | 32.7                                        | 175/535 |                                             |          |
|                      | Tallest (>152 cm)       | 35.5                                        | 190/535 | 85.1                                        | 895/1052 |
| Education            |                         |                                             |         |                                             |          |
|                      | No Education            | 29.1                                        | 156/536 | 38.3                                        | 404/1054 |
|                      | 1-5 years               | 70.9                                        | 380/536 | 61.7                                        | 650/1054 |
|                      | > 5 years               |                                             |         |                                             |          |
| SES                  |                         |                                             |         |                                             |          |
|                      | Lowest                  | 32.5                                        | 174/536 | 26.6                                        | 280/1054 |
|                      | Middle                  | 28.4                                        | 152/536 | 33.7                                        | 355/1054 |
|                      | Highest                 | 39.2                                        | 210/536 | 39.8                                        | 419/1054 |
| Children             |                         |                                             |         |                                             |          |
| Sex                  |                         |                                             |         |                                             |          |
|                      | Girl                    | 47.6                                        | 255/536 | 48.7                                        | 541/1054 |
|                      | Boy                     | 52.4                                        | 281/536 | 51.3                                        | 513/1054 |
| Season of conception |                         |                                             |         |                                             |          |
|                      | Winter (Nov-Feb)        | 32.8                                        | 176/536 | 33.5                                        | 353/1054 |
|                      | Pre-monsoon (Mars-May)  | 29.7                                        | 159/536 | 29.5                                        | 311/1054 |
|                      | Monsoon (Jun-Oct)       | 37.7                                        | 176/536 | 37.0                                        | 390/1054 |
| SGA <sup>2</sup>     |                         | 61.9                                        | 332/536 | 61,9                                        | 652/1054 |
| LBW <sup>3</sup>     |                         | 36.0                                        | 192/534 | 32.2                                        | 339/1053 |
| Stunted <sup>4</sup> |                         | 18.3                                        | 98/536  | 16.1                                        | 170/1054 |
| Preterm <sup>5</sup> |                         | 10.4                                        | 56/536  | 8.2                                         | 86/1054  |

<sup>1</sup> Children born between April 2002 and June 2003 not analyzed due to losses of follow up or missing data.

<sup>2</sup> Small for gestational age (Birth weight below reference for gestational week at birth (54)

<sup>3</sup> Low Birth Weight ( <2500 g)

<sup>4</sup> Below 2 SD from WHO growth standards

<sup>5</sup> Born before 37 weeks of gestation
