# Supplementary material
Source: publisher figshare collection journal article supplement (https://plos.figshare.com/articles/dataset/_/3094207)
Supplement: Supplementary file [file 1]

**S2 Table.** Mean height for age scores and mean difference in height from reference of children participating in the MINIMat trial, Bangladesh, from birth to ten years.

| Age    |  | Girls                         |                               |  | Boys                          |                               |  | Total                         |                               |
|--------|--|-------------------------------|-------------------------------|--|-------------------------------|-------------------------------|--|-------------------------------|-------------------------------|
| Months |  | Mean HAD <sup>1</sup><br>(SD) | Mean HAZ <sup>2</sup><br>(SD) |  | Mean HAD <sup>1</sup><br>(SD) | Mean HAZ <sup>2</sup><br>(SD) |  | Mean HAD <sup>1</sup><br>(SD) | Mean HAZ <sup>2</sup><br>(SD) |
|        |  |                               |                               |  |                               |                               |  |                               |                               |
| 0      |  | -1.65 (2.09)                  | -0.89 (1.12)                  |  | -1.78 (2.23)                  | -0.94 (1.18)                  |  | -1.72 (2.17)                  | -0.91 (1.15)                  |
| 1      |  | -2.15 (2.10)                  | -1.10 (1.08)                  |  | -2.32 (2.25)                  | -1.19 (1.16)                  |  | -2.24 (2.18)                  | -1.15 (1.12)                  |
| 2      |  | -2.23 (2.07)                  | -1.10 (1.02)                  |  | -2.47 (2.25)                  | -1.23 (1.13)                  |  | -2.35 (2.17)                  | -1.17 (1.08)                  |
| 3      |  | -2.41 (2.12)                  | -1.15 (1.01)                  |  | -2.67 (2.27)                  | -1.30 (1.11)                  |  | -2.54 (2.20)                  | -1.23 (1.06)                  |
| 4      |  | -2.47 (2.07)                  | -1.14 (0.96)                  |  | -2.70 (2.31)                  | -1.30 (1.01)                  |  | -2.59 (2.20)                  | -1.22 (1.04)                  |
| 5      |  | -2.58 (2.08)                  | -1.16 (0.94)                  |  | -2.70 (2.16)                  | -1.28 (1.02)                  |  | -2.64 (2.12)                  | -1.22 (0.98)                  |
| 6      |  | -2.75 (2.14)                  | -1.22 (0.95)                  |  | -2.99 (2.32)                  | -1.40 (1.09)                  |  | -2.88 (2.24)                  | -1.31 (1.02)                  |
| 7      |  | -2.90 (2.20)                  | -1.25 (0.95)                  |  | -3.22 (2.40)                  | -1.48 (1.03)                  |  | -3.06 (2.31)                  | -1.37 (1.03)                  |
| 8      |  | -3.11 (2.24)                  | -1.31 (0.95)                  |  | -3.30 (2.47)                  | -1.50 (1.12)                  |  | -3.21 (2.36)                  | -1.41 (1.04)                  |
| 9      |  | -3.30 (2.34)                  | -1.36 (0.97)                  |  | -3.48 (2.47)                  | -1.55 (1.10)                  |  | -3.39 (2.41)                  | -1.46 (1.04)                  |
| 10     |  | -3.56 (2.37)                  | -1.44 (0.96)                  |  | -3.72 (2.54)                  | -1.63 (1.11)                  |  | -3.64 (2.46)                  | -1.54 (1.04)                  |
| 11     |  | -3.79 (2.40)                  | -1.50 (0.95)                  |  | -4.00 (2.56)                  | -1.72 (1.11)                  |  | -3.90 (2.49)                  | -1.61 (1.04)                  |
| 12     |  | -3.98 (2.52)                  | -1.55 (0.98)                  |  | -4.17 (2.65)                  | -1.76 (1.11)                  |  | -4.08 (2.59)                  | -1.65 (1.06)                  |
| 15     |  | -4.87 (2.59)                  | -1.78 (0.95)                  |  | -5.00 (2.78)                  | -1.98 (1.10)                  |  | -4.94 (2.69)                  | -1.88 (1.03)                  |
| 18     |  | -5.46 (2.88)                  | -1.88 (0.99)                  |  | -5.53 (2.95)                  | -2.05 (1.09)                  |  | -5.50 (2.91)                  | -1.97 (1.05)                  |
| 21     |  | -6.07 (2.97)                  | -1.98 (0.97)                  |  | -6.14 (3.22)                  | -2.14 (1.12)                  |  | -6.11 (3.11)                  | -2.06 (1.05)                  |
| 24     |  | -6.61 (3.20)                  | -2.05 (0.99)                  |  | -6.59 (3.36)                  | -2.16 (1.10)                  |  | -6.60 (3.28)                  | -2.10 (1.05)                  |
| 54     |  | -7.53 (3.99)                  | -1.66 (0.88)                  |  | -6.85 (4.27)                  | -1.55 (0.97)                  |  | -7.18 (4.15)                  | -1.60 (0.93)                  |
| 120    |  | -9.54 (6.89)                  | -1.49 (1.08)                  |  | -8.78 (6.01)                  | -1.38 (0.94)                  |  | -9.15 (6.46)                  | -1.43 (1.01)                  |

<sup>1</sup> Height in cm from WHO growth reference median

<sup>2</sup> Height-for-age z-scores
