# Supplementary material
Source: publisher figshare collection journal article supplement (https://plos.figshare.com/articles/dataset/_/3094207)
Supplement: Supplementary file [file 1]

**S3 Table.** Prevalence of stunting of children participating in the MINIMat trial, Bangladesh, from birth to ten years.

| Age    | Girls                       |                           | Boys                        |                           | Total                       |                           |
|--------|-----------------------------|---------------------------|-----------------------------|---------------------------|-----------------------------|---------------------------|
| Months | n/N<br>Stunted <sup>1</sup> | %<br>Stunted <sup>1</sup> | n/N<br>Stunted <sup>1</sup> | %<br>Stunted <sup>1</sup> | n/N<br>Stunted <sup>1</sup> | %<br>Stunted <sup>1</sup> |
| 0      | 81/513                      | 15.8                      | 89/541                      | 16.5                      | 170/1054                    | 16.1                      |
| 1      | 102/512                     | 19.9                      | 113/540                     | 20.9                      | 215/1052                    | 20.4                      |
| 2      | 94/513                      | 18.3                      | 133/541                     | 24.6                      | 227/1054                    | 21.5                      |
| 3      | 89/512                      | 17.4                      | 136/541                     | 25.1                      | 225/1053                    | 21.4                      |
| 4      | 85/513                      | 16.6                      | 133/541                     | 24.6                      | 218/1054                    | 20.7                      |
| 5      | 84/511                      | 16.4                      | 108/541                     | 20.0                      | 192/1052                    | 18.3                      |
| 6      | 96/513                      | 18.7                      | 152/541                     | 28.1                      | 248/1054                    | 23.5                      |
| 7      | 107/512                     | 20.9                      | 155/540                     | 28.7                      | 262/1052                    | 24.9                      |
| 8      | 112/512                     | 21.9                      | 179/541                     | 33.1                      | 291/1053                    | 27.6                      |
| 9      | 124/512                     | 24.2                      | 182/540                     | 33.7                      | 306/1052                    | 29.1                      |
| 10     | 135/512                     | 26.4                      | 191/539                     | 35.4                      | 326/1051                    | 31.0                      |
| 11     | 146/511                     | 28.6                      | 215/540                     | 39.8                      | 361/1051                    | 34.3                      |
| 12     | 155/509                     | 30.5                      | 215/540                     | 39.8                      | 370/1049                    | 35.3                      |
| 15     | 210/511                     | 41.1                      | 253/540                     | 46.9                      | 463/1051                    | 44.1                      |
| 18     | 236/512                     | 46.1                      | 284/541                     | 52.5                      | 520/1053                    | 49.4                      |
| 21     | 264/512                     | 51.6                      | 307/540                     | 56.9                      | 571/1052                    | 54.3                      |
| 24     | 260/513                     | 50.7                      | 295/541                     | 54.5                      | 555/1054                    | 53.7                      |
| 54     | 180/513                     | 35.1                      | 179/541                     | 33.1                      | 359/1054                    | 34.1                      |
| 120    | 166/513                     | 32.4                      | 142/541                     | 26.2                      | 308/1054                    | 29.2                      |

<sup>1</sup>Below minus 2 standard deviations from WHO growth reference median
